# Supplementary material
Source: PubMed Central journal article supplement (PMC5951634)
Supplement: NIHMS955989-supplement-Supplemental_Materials.pdf [file NIHMS955989-supplement-Supplemental_Materials.pdf]

**Authors:****Table 1: EPGP Collaborative Authors and Contributions**

| Author                    | Institution                                          | Study PI | Clinical Site PI | Clinical Site Co-PI | Referral Center PI | Administrative Core | Phenotyping Core | Informatics Core | Neurophysiology Core | Imaging Core | Pharmacogenomics Core | Genomics and Data Analysis Core | Data Review Core | Publications Committee | Writing of manuscript |
|---------------------------|------------------------------------------------------|----------|------------------|---------------------|--------------------|---------------------|------------------|------------------|----------------------|--------------|-----------------------|---------------------------------|------------------|------------------------|-----------------------|
| Abou-Khalil, Bassel, MD   | Vanderbilt University Medical Center                 |          | X                |                     |                    |                     |                  |                  |                      |              |                       |                                 | X                |                        |                       |
| Allredge, Brian, PharmD   | University of California, San Francisco              |          |                  |                     |                    |                     |                  |                  |                      |              | X                     |                                 |                  |                        |                       |
| Bautista, Jocelyn, MD     | Cleveland Clinic                                     |          | X                |                     |                    |                     |                  |                  |                      |              |                       |                                 |                  |                        |                       |
| Berkovic, Sam, MD         | The University of Melbourne                          |          | X                |                     |                    |                     |                  |                  |                      |              |                       |                                 |                  |                        |                       |
| Bluvstein, Judith, MD     | New York University School of Medicine               |          |                  | X                   |                    |                     |                  |                  |                      |              |                       |                                 | X                |                        |                       |
| Boro, Alex, MD            | Albert Einstein College of Medicine                  |          |                  |                     |                    |                     |                  |                  | X                    |              |                       |                                 |                  |                        |                       |
| Cascino, Gregory, MD      | Mayo Clinic College of Medicine Rochester, Minnesota |          | X                |                     |                    |                     |                  |                  |                      | X            |                       |                                 |                  |                        |                       |
| Consalvo, Damian, MD, PhD | Hospital General de Agudos José María Ramos Mejía    |          | X                |                     |                    |                     |                  |                  |                      |              |                       |                                 |                  |                        |                       |

| Author                                             | Institution                               | Study PI | Clinical Site PI | Clinical Site Co-PI | Referral Center PI | Administrative Core | Phenotyping Core | Informatics Core | Neurophysiology Core | Imaging Core | Pharmacogenomics Core | Genomics and Data Analysis Core | Data Review Core | Publications Committee | Writing of manuscript |
|----------------------------------------------------|-------------------------------------------|----------|------------------|---------------------|--------------------|---------------------|------------------|------------------|----------------------|--------------|-----------------------|---------------------------------|------------------|------------------------|-----------------------|
| Cristofaro, Sabrina, RN, BSN, Phenotyping Director | New York University                       |          |                  |                     |                    | X                   |                  |                  |                      |              |                       |                                 |                  |                        | X                     |
| Crumrine, Patricia, MD                             | Children's Hospital of Pittsburgh of UPMC |          | X                |                     |                    |                     |                  |                  |                      |              |                       |                                 |                  |                        |                       |
| Devinsky, Orrin, MD                                | New York University School of Medicine    |          | X                |                     |                    | X                   | X                |                  |                      |              |                       |                                 | X                | X                      |                       |
| Dlugos, Dennis, MD, MCSE                           | The Children's Hospital of Philadelphia   |          | X                |                     |                    |                     | X                |                  | X                    |              |                       |                                 |                  | X                      |                       |
| Epstein, Michael, PhD                              | Emory University School of Medicine       |          |                  |                     |                    |                     |                  |                  |                      |              |                       | X                               |                  |                        |                       |
| Fahlstrom, Robyn, MPH, Data Monitor                | University of California, San Francisco   |          |                  |                     |                    | X                   |                  |                  |                      |              |                       |                                 |                  | X                      | X                     |
| Fiol, Miguel, MD                                   | University of Minnesota Medical Center    |          |                  |                     | X                  |                     |                  |                  |                      |              |                       |                                 |                  |                        |                       |
| Fountain, Nathan, MD                               | University of Virginia Health System      |          | X                |                     |                    |                     |                  |                  |                      |              |                       |                                 |                  |                        |                       |
| Fox, Kristen, RN,MS, Recruitment Director          | University of California, San Francisco   |          |                  |                     |                    | X                   |                  |                  |                      |              |                       |                                 |                  |                        | X                     |

| Author                                   | Institution                                   | Study PI | Clinical Site PI | Clinical Site Co-PI | Referral Center PI | Administrative Core | Phenotyping Core | Informatics Core | Neurophysiology Core | Imaging Core | Pharmacogenomics Core | Genomics and Data Analysis Core | Data Review Core | Publications Committee | Writing of manuscript |
|------------------------------------------|-----------------------------------------------|----------|------------------|---------------------|--------------------|---------------------|------------------|------------------|----------------------|--------------|-----------------------|---------------------------------|------------------|------------------------|-----------------------|
| French, Jacqueline, MD                   | New York University School of Medicine        |          |                  |                     |                    |                     |                  |                  |                      |              | X                     |                                 |                  |                        |                       |
| Freyer Karn, Catharine, Project Director | University of California, San Francisco       |          |                  |                     |                    | X                   |                  |                  |                      |              |                       |                                 |                  | X                      | X                     |
| Friedman, Daniel, MD                     | New York University School of Medicine        |          |                  | X                   |                    |                     |                  |                  |                      |              |                       |                                 |                  |                        |                       |
| Geller, Eric, MD                         | St. Barnabas Health Care System               |          | X                |                     |                    |                     |                  |                  |                      |              |                       |                                 |                  |                        |                       |
| Glauser, Tracy, MD                       | Cincinnati Children's Hospital Medical Center |          | X                |                     |                    |                     |                  |                  |                      |              | X                     |                                 |                  |                        |                       |
| Glynn, Simon, MD                         | University of Michigan                        |          | X                |                     |                    |                     |                  |                  |                      |              |                       |                                 |                  |                        |                       |
| Haas, Kevin, MD                          | Vanderbilt University Medical Center          |          | X                |                     |                    |                     |                  |                  |                      |              |                       |                                 |                  |                        |                       |
| Haut, Sheryl, MD, MS                     | Albert Einstein College of Medicine           |          | X                |                     |                    |                     |                  |                  |                      |              |                       |                                 |                  |                        |                       |
| Hayward, Jean, MD                        | Kaiser Permanente: Oakland Medical Center     |          |                  |                     | X                  |                     |                  |                  |                      |              |                       |                                 |                  |                        |                       |

| Author                 | Institution                                            | Study PI | Clinical Site PI | Clinical Site Co-PI | Referral Center PI | Administrative Core | Phenotyping Core | Informatics Core | Neurophysiology Core | Imaging Core | Pharmacogenomics Core | Genomics and Data Analysis Core | Data Review Core | Publications Committee | Writing of manuscript |
|------------------------|--------------------------------------------------------|----------|------------------|---------------------|--------------------|---------------------|------------------|------------------|----------------------|--------------|-----------------------|---------------------------------|------------------|------------------------|-----------------------|
| Helmers, Sandra, MD    | Emory University School of Medicine                    |          | X                |                     |                    |                     |                  |                  |                      |              |                       |                                 |                  |                        |                       |
| Joshi, Sucheta, MD     | University of Michigan                                 |          |                  |                     |                    |                     |                  |                  | X                    |              |                       |                                 |                  |                        |                       |
| Kanner, Andres, MD     | Rush University Medical Center                         |          |                  |                     |                    |                     |                  |                  |                      |              | X                     |                                 |                  |                        |                       |
| Kirsch, Heidi, MD, MS  | University of California, San Francisco                |          | X                |                     |                    |                     |                  |                  |                      |              |                       |                                 |                  | X                      |                       |
| Knowlton, Robert, MD   | University of Alabama at Birmingham School of Medicine |          | X                |                     |                    |                     |                  |                  |                      | X            |                       |                                 |                  |                        |                       |
| Kossoff, Eric, MD      | The Johns Hopkins University School of Medicine        |          |                  | X                   |                    |                     |                  |                  |                      |              |                       |                                 |                  |                        |                       |
| Kuperman, Rachel, MD   | Children's Hospital & Research Center Oakland          |          |                  |                     | X                  |                     |                  |                  |                      |              |                       |                                 |                  |                        |                       |
| Kuzniecky, Ruben, MD   | New York University School of Medicine                 | X        |                  |                     |                    | X                   | X                |                  |                      | X            |                       |                                 | X                | X                      |                       |
| Lowenstein, Daniel, MD | University of California, San Francisco                | X        |                  |                     |                    | X                   | X                |                  |                      |              |                       |                                 | X                | X                      | X                     |

| Author                                        | Institution                                       | Study PI | Clinical Site PI | Clinical Site Co-PI | Referral Center PI | Administrative Core | Phenotyping Core | Informatics Core | Neurophysiology Core | Imaging Core | Pharmacogenomics Core | Genomics and Data Analysis Core | Data Review Core | Publications Committee | Writing of manuscript |
|-----------------------------------------------|---------------------------------------------------|----------|------------------|---------------------|--------------------|---------------------|------------------|------------------|----------------------|--------------|-----------------------|---------------------------------|------------------|------------------------|-----------------------|
| McGuire, Shannon, MD                          | Louisiana State University Health Sciences Center |          | X                |                     |                    |                     |                  |                  |                      |              |                       |                                 |                  |                        |                       |
| Motika, Paul, MD                              | Rush University Medical Center                    |          |                  | X                   |                    |                     |                  |                  |                      |              |                       |                                 |                  |                        |                       |
| Nesbitt, Gerard, MBA, Director of Informatics | University of California, San Francisco           |          |                  |                     |                    |                     |                  | X                |                      |              |                       |                                 |                  | X                      | X                     |
| Novotny, Edward, MD                           | Seattle Children's Hospital                       |          | X                |                     |                    |                     |                  |                  |                      |              |                       |                                 |                  |                        |                       |
| Ottman, Ruth, PhD                             | Columbia University                               |          |                  |                     |                    |                     | X                |                  |                      |              |                       | X                               |                  | X                      | X                     |
| Paolicchi, Juliann, MD                        | Vanderbilt University Medical Center              |          | X                |                     |                    |                     |                  |                  |                      |              |                       |                                 | X                | X                      |                       |
| Parent, Jack, MD                              | University of Michigan                            |          |                  | X                   |                    |                     |                  |                  |                      |              |                       |                                 |                  |                        |                       |
| Park, Kristen, MD                             | Children's Hospital Colorado                      |          | X                |                     |                    |                     |                  |                  |                      |              |                       |                                 |                  |                        |                       |
| Poduri, Annapurna, MD                         | Children's Hospital Boston                        |          | X                |                     |                    |                     |                  |                  |                      |              |                       |                                 | X                | X                      |                       |
| Risch, Neil, PhD                              | University of California, San Francisco           |          |                  |                     |                    |                     |                  |                  |                      |              |                       | X                               |                  |                        |                       |

| Author                             | Institution                                                            | Study PI | Clinical Site PI | Clinical Site Co-PI | Referral Center PI | Administrative Core | Phenotyping Core | Informatics Core | Neurophysiology Core | Imaging Core | Pharmacogenomics Core | Genomics and Data Analysis Core | Data Review Core | Publications Committee | Writing of manuscript |
|------------------------------------|------------------------------------------------------------------------|----------|------------------|---------------------|--------------------|---------------------|------------------|------------------|----------------------|--------------|-----------------------|---------------------------------|------------------|------------------------|-----------------------|
| Sadleir, Lynette, MBChB, FRACP, MD | Wellington School of Medicine and Health Sciences, University of Otago |          | X                |                     |                    |                     |                  |                  |                      |              |                       |                                 |                  |                        |                       |
| Scheffer, Ingrid, MBBS, PhD        | The University of Melbourne                                            |          | X                |                     |                    |                     |                  |                  |                      |              |                       |                                 |                  |                        |                       |
| Shellhaas, Renee, MD               | University of Michigan                                                 |          |                  |                     |                    |                     |                  |                  | X                    |              |                       |                                 |                  |                        |                       |
| Sherr, Elliott, MD, PhD            | University of California, San Francisco                                |          |                  |                     |                    |                     | X                |                  |                      |              |                       | X                               |                  |                        |                       |
| Shih, Jerry J., MD                 | Mayo Clinic College of Medicine Jacksonville, Florida                  |          | X                |                     |                    |                     |                  |                  |                      |              |                       |                                 | X                | X                      |                       |
| Shinnar, Shlomo, MD, PhD           | Albert Einstein College of Medicine                                    |          |                  |                     |                    |                     | X                |                  |                      |              |                       |                                 |                  |                        |                       |
| Singh, Rani, MD                    | University of Michigan                                                 |          |                  | X                   |                    |                     |                  |                  |                      |              |                       |                                 |                  |                        |                       |
| Sirven, Joseph, MD                 | Mayo Clinic College of Medicine Scottsdale, Arizona                    |          | X                |                     |                    |                     |                  |                  |                      |              |                       |                                 |                  |                        |                       |
| Smith, Michael, MD                 | Rush University Medical Center                                         |          | X                |                     |                    |                     |                  |                  |                      |              |                       |                                 |                  |                        |                       |
| Sullivan, Joe, MD                  | University of California, San Francisco                                |          |                  |                     |                    |                     |                  |                  | X                    |              |                       |                                 |                  |                        |                       |

| Author                          | Institution                                          | Study PI | Clinical Site PI | Clinical Site Co-PI | Referral Center PI | Administrative Core | Phenotyping Core | Informatics Core | Neurophysiology Core | Imaging Core | Pharmacogenomics Core | Genomics and Data Analysis Core | Data Review Core | Publications Committee | Writing of manuscript |
|---------------------------------|------------------------------------------------------|----------|------------------|---------------------|--------------------|---------------------|------------------|------------------|----------------------|--------------|-----------------------|---------------------------------|------------------|------------------------|-----------------------|
| Thio, Liu Lin, MD, PhD          | Washington University in St. Louis                   |          | X                |                     |                    |                     |                  |                  |                      |              |                       |                                 |                  | X                      |                       |
| Venkat, Anu, MD                 | The Children's Hospital of Philadelphia              |          |                  | X                   |                    |                     |                  |                  |                      |              |                       |                                 |                  |                        |                       |
| Vining, Eileen, MD              | The Johns Hopkins University School of Medicine      |          | X                |                     |                    |                     |                  |                  |                      |              |                       |                                 |                  | X                      |                       |
| Von Allmen, Gretchen, MD        | University of Texas Health Science Center at Houston |          | X                |                     |                    |                     |                  |                  |                      |              |                       |                                 |                  |                        |                       |
| Weisenberg, Judith, MD          | Washington University in St. Louis                   |          | X                |                     |                    |                     |                  |                  |                      |              |                       |                                 |                  | X                      |                       |
| Widdess-Walsh, Peter, MB, FRCPI | St. Barnabas Health Care System                      |          | X                |                     |                    |                     |                  |                  |                      |              |                       |                                 | X                |                        |                       |
| Winawer, Melodie, MD, MS        | Columbia University                                  |          |                  |                     |                    |                     |                  |                  |                      |              |                       |                                 | X                | X                      |                       |

### **Acknowledgements:**

#### Administrative Core Members:

- Kathleen McGovern, Recruitment Assistant
- Nora Stillman, Recruitment Assistant

#### Informatics Core Members:

- Kevin McKenna, Database Manager
- Vickie Mays, Data Coordinator
- Michael Williams, Informatics
- Alan Carpenter, Programmer Analyst
- Kevin Miller, Programmer Analyst

Study Coordinators:

- Prashant Agarwal; Study Coordinator; The Children's Hospital of Philadelphia
- Jennifer Ayala; Study Coordinator; Albert Einstein College of Medicine
- Cate Bakey; Study Coordinator; The Children's Hospital of Philadelphia
- Thomas Borkowski, PhD; Study Coordinator; Albert Einstein College of Medicine
- Riann Boyd, CCRP; Study Coordinator; Mayo Clinic College of Medicine Jacksonville, Florida
- Alicia Camuto, CCRP; Study Coordinator; The Children's Hospital Denver
- Cendy Carrasco; Study Coordinator; University of California, San Francisco
- Jennifer Cassarly; Study Coordinator; Cincinnati Children's Hospital Medical Center
- Yong Collins, RN; Study Coordinator; The Children's Hospital of Philadelphia
- Kevin Collon; Study Coordinator; University of Michigan
- Sean Collon; Study Coordinator; University of Michigan
- Heather Eckman; Study Coordinator; New York University School of Medicine
- Susan Fogarty, RN; Study Coordinator; University of Texas Health Science Center at Houston
- Dolores González Morón, MD; Study Coordinator; Hospital General de Agudos José María Ramos Mejía
- La June Grayson; Study Coordinator; Washington University in St. Louis
- Samantha Hagopian, RN; Study Coordinator; The Children's Hospital of Philadelphia
- Emily Hayden; Study Coordinator; University of Michigan
- Kristin Heggeli; Study Coordinator; Mayo Clinic College of Medicine Jacksonville, Florida
- Rachel Hennessy; Study Coordinator; New York University School of Medicine
- Jody Hessling, RN; Study Coordinator; Cincinnati Children's Hospital Medical Center
- Emily Hirschfield; Study Coordinator; Cincinnati Children's Hospital Medical Center
- Jennifer Howell, BA, BS; Study Coordinator; University of Alabama at Birmingham School of Medicine
- Sherry Klingerman; Study Coordinator; Mayo Clinic College of Medicine Rochester, Minnesota
- Maritza Lopez, RN; Study Coordinator; University of California, San Francisco
- Heather Marinelli; Study Coordinator; The Johns Hopkins University School of Medicine
- Brandy Maschhaupt; Study Coordinator; Mayo Clinic College of Medicine Scottsdale, Arizona
- Jennie Minnick; Study Coordinator; The Children's Hospital of Philadelphia
- Jade Misajon, RN; Study Coordinator; St. Barnabas Health Care System
- Jennifer Monahan, RN; Study Coordinator; Children's Hospital of Pittsburgh of UPMC
- Karen Oliver; Study Coordinator; The University of Melbourne
- Isha Parulkar; Study Coordinator; Children's Hospital Boston
- Laura Przepiorka, RN; Study Coordinator; Rush University Medical Center
- Paula Pyzik, BA, CRT; Study Coordinator; The Johns Hopkins University School of Medicine



- Brigid Regan; Study Coordinator; The University of Melbourne
- Catherine Shain; Study Coordinator; Children's Hospital Boston
- Lexie Slingerland; Study Coordinator; The University of Melbourne
- Caitlin Stanton, MPH; Study Coordinator; Seattle Children's Hospital
- Kelly Taylor, MS, CGC; Study Coordinator; Vanderbilt University Medical Center
- Stacy Thompson, RN, BSN, CCRC; Study Coordinator; University of Virginia Health System
- Jennifer Turczyk; Study Coordinator; Cleveland Clinic
- Alexander Vara; Study Coordinator; University of Texas Health Science Center at Houston
- Cindy Wesolowski, RN, NP; Study Coordinator; Cincinnati Children's Hospital Medical Center
- Andrew Yourich; Study Coordinator; University of Alabama at Birmingham School of Medicine

## REFERENCES

1. Linehan, C. and M. Kerr, *Epidemiology of epilepsy in developed countries*, in *Atlas of Epilepsies*, Benbadis SR, et al., Editors. 2010, Springer: London. p. 51-56.
2. Diagan M, et al., *Epidemiology of epilepsy in resource poor countries*, in *Atlas of Epilepsies*, Benbadis SR, et al., Editors. 2010, Springer: London. p. 57-63.
3. Hesdorffer, D.C., et al., *Estimating risk for developing epilepsy: a population-based study in Rochester, Minnesota*. *Neurology*. **76**(1): p. 23-7.
4. Begley, C.E., et al., *The cost of epilepsy in the United States: an estimate from population-based clinical and survey data*. *Epilepsia*, 2000. **41**(3): p. 342-51.
5. Berg, A.T., *Understanding the delay before epilepsy surgery: Who develops intractable focal epilepsy and when?* . *CNS Spectrums*, 2004(9): p. 136-144.
6. Wirrell, E.C., et al., *Long-term psychosocial outcome in typical absence epilepsy. Sometimes a wolf in sheeps' clothing*. *Archives of pediatrics & adolescent medicine*, 1997. **151**(2): p. 152-8.
7. Annegers, J.F., et al., *The risks of seizure disorders among relatives of patients with childhood onset epilepsy*. *Neurology*, 1982. **32**(2): p. 174-9.
8. Ottman, R., et al., *Relations of genetic and environmental factors in the etiology of epilepsy*. *Ann Neurol*, 1996. **39**(4): p. 442-9.
9. Bianchi, A., S. Viaggi, and E. Chirossi, *Family study of epilepsy in first degree relatives: data from the Italian Episcreeen Study*. *Seizure*, 2003. **12**(4): p. 203-10.
10. Hemminki, K., et al., *Familial risks for epilepsy among siblings based on hospitalizations in Sweden*. *Neuroepidemiology*, 2006. **27**(2): p. 67-73.
11. Vadlamudi, L., et al., *Epilepsy in twins: insights from unique historical data of William Lennox*. *Neurology*, 2004. **62**(7): p. 1127-33.
12. Berkovic, S.F., et al., *Epilepsies in twins: genetics of the major epilepsy syndromes*. *Ann Neurol*, 1998. **43**(4): p. 435-45.
13. Corey, L.A., et al., *The occurrence of epilepsy and febrile seizures in Virginian and Norwegian twins*. *Neurology*, 1991. **41**(9): p. 1433-6.
14. Kjeldsen, M.J., et al., *Epileptic seizures and syndromes in twins: the importance of genetic factors*. *Epilepsy Res*, 2003. **55**(1-2): p. 137-46.
15. Ottman, R., et al., *Genetic testing in the epilepsies-Report of the ILAE Genetics Commission*. *Epilepsia*, 2010. **51**(4): p. 655-670.
16. Reid, C.A., S.F. Berkovic, and S. Petrou, *Mechanisms of human inherited epilepsies*. *Prog Neurobiol*, 2009. **87**(1): p. 41-57.
17. Helbig, I., et al., *Navigating the channels and beyond: unravelling the genetics of the epilepsies*. *Lancet Neurol*, 2008. **7**(3): p. 231-45.
18. Ottman, R., *Analysis of genetically complex epilepsies*. *Epilepsia*, 2005. **46 Suppl 10**: p. 7-14.
19. Chakravarti, A., *To a future of genetic medicine*. *Nature*, 2001. **409**(6822): p. 822-3.
20. Lander, E.S., *The new genomics: global views of biology*. *Science*, 1996. **274**(5287): p. 536-9.

21. Singleton, A.B., et al., *Towards a complete resolution of the genetic architecture of disease*. Trends Genet, 2010. **26**(10): p. 438-42.
22. Cavalleri, G.L., et al., *Multicentre search for genetic susceptibility loci in sporadic epilepsy syndrome and seizure types: a case-control study*. Lancet Neurol, 2007. **6**(11): p. 970-80.
23. Kasperaviciute, D., et al., *Common genetic variation and susceptibility to partial epilepsies: a genome-wide association study*. Brain, 2010. **133**(Pt 7): p. 2136-47.
24. Goldstein, D.B., *Common genetic variation and human traits*. N Engl J Med, 2009. **360**(17): p. 1696-8.
25. Manolio, T.A., et al., *Finding the missing heritability of complex diseases*. Nature, 2009. **461**(7265): p. 747-53.
26. de Kovel, C.G., et al., *Recurrent microdeletions at 15q11.2 and 16p13.11 predispose to idiopathic generalized epilepsies*. Brain, 2010. **133**(Pt 1): p. 23-32.
27. Heinzen, E.L., et al., *Rare deletions at 16p13.11 predispose to a diverse spectrum of sporadic epilepsy syndromes*. Am J Hum Genet, 2010. **86**(5): p. 707-18.
28. Helbig, I., et al., *15q13.3 microdeletions increase risk of idiopathic generalized epilepsy*. Nat Genet, 2009. **41**(2): p. 160-2.
29. Mefford, H.C., et al., *Genome-wide copy number variation in epilepsy: novel susceptibility loci in idiopathic generalized and focal epilepsies*. PLoS Genet, 2010. **6**(5): p. e1000962.
30. Scheffer, I.E. and S.F. Berkovic, *Copy number variants--an unexpected risk factor for the idiopathic generalized epilepsies*. Brain, 2010. **133**(Pt 1): p. 7-8.
31. Kearney, J.A., et al., *Recurrent De Novo Mutations of SCN1A in Severe Myoclonic Epilepsy of Infancy*. Pediatr Neurol, 2006. **34**(2): p. 116-20.
32. Claes, L., et al., *De novo mutations in the sodium-channel gene SCN1A cause severe myoclonic epilepsy of infancy*. Am J Hum Genet, 2001. **68**(6): p. 1327-32.
33. Pereira, S., et al., *Severe epilepsy, retardation, and dysmorphic features with a 2q deletion including SCN1A and SCN2A*. Neurology, 2004. **63**(1): p. 191-2.
34. Villard, L., et al., *A locus for bilateral perisylvian polymicrogyria maps to Xq28*. Am J Hum Genet, 2002. **70**(4): p. 1003-8.
35. Jansen, A. and E. Andermann, *Genetics of the polymicrogyria syndromes*. J Med Genet, 2005. **42**(5): p. 369-78.
36. Leeftang, E.P., et al., *Patient with bilateral periventricular nodular heterotopia and polymicrogyria with apparently balanced reciprocal translocation t(1;6)(p12;p12.2) that interrupts the mannosidase alpha, class IA, and glutathione S-transferase A2 genes*. J Med Genet, 2003. **40**(12): p. e128.
37. Saitsu, H., et al., *De novo mutations in the gene encoding STXBPI (MUNC18-1) cause early infantile epileptic encephalopathy*. Nat Genet, 2008. **40**: p. 782-788.
38. Mencarelli, M.A., et al., *Novel FOXP1 mutations associated with the congenital variant of Rett syndrome*. J Med Genet, 2010. **47**: p. 49-53.
39. Bahi-Buisson, N., et al., *The three stages of epilepsy in patients with CDKL5 mutations*. Epilepsia 2008. **49**: p. 1027-1037.
40. Sherr, E.H., *The ARX story (epilepsy, mental retardation, autism, and cerebral malformations): one gene leads to many phenotypes*. Curr Opin Pediatr, 2003. **15**(6): p. 567-71.

41. Nesbitt, G., Kevin McKenna, Vickie Mays, Alan Carpenter, Kevin Miller, Michael Williams, *The Epilepsy Phenome/Genome Project (EPGP) informatics platform*. International Journal of Medical Informatics, 2012.

**Table 2: EPGP Inclusion and Exclusion Criteria**

| <b>All Participants with Epilepsy</b>                                                                                                                                                                                                                                                                                                                                                                                                                                                                                                                                                                                                                                                                                                                                                                                                                                                                                                                                                                                                                                                                                                                                                                                                                                                                                                                                                                                                                                                                                                                              |
|--------------------------------------------------------------------------------------------------------------------------------------------------------------------------------------------------------------------------------------------------------------------------------------------------------------------------------------------------------------------------------------------------------------------------------------------------------------------------------------------------------------------------------------------------------------------------------------------------------------------------------------------------------------------------------------------------------------------------------------------------------------------------------------------------------------------------------------------------------------------------------------------------------------------------------------------------------------------------------------------------------------------------------------------------------------------------------------------------------------------------------------------------------------------------------------------------------------------------------------------------------------------------------------------------------------------------------------------------------------------------------------------------------------------------------------------------------------------------------------------------------------------------------------------------------------------|
| <ul style="list-style-type: none"> <li>• Current age 4 weeks and older. No restriction on upper age limit</li> <li>• Two or more UNPROVOKED seizures. (Febrile seizures, acute symptomatic seizures, seizures from alcohol, metabolic seizures, or toxic seizures are allowed, in addition to unprovoked seizures)</li> <li>• One unprovoked seizure with epileptiform EEG with clear diagnosis of epilepsy type: <b>send for adjudication</b></li> <li>• No identified antecedent cause of epilepsy (i.e., a structural or metabolic insult to the CNS prior to the first unprovoked seizure, such as stroke, brain tumor, severe head trauma, etc., or a progressive neurodegenerative disorder)</li> <li>• Head circumference &lt;2.5 standard deviations from normal at the time of enrollment</li> <li>• Age at first unprovoked seizure &lt;45 y.o. If age of onset is ≥45 y.o.: <b>send for adjudication</b></li> <li>• No recognized genetic syndrome, chromosomal abnormality or pathogenic mutation in a previously identified epilepsy gene. If positive genetic result: <b>send for adjudication</b></li> <li>• High quality clinical and laboratory data (medical records, MRI file or EEG file or report, or reference in the medical record of EEG and/or MRI results for the past 2 years, or from seizure onset if &lt;2 years). If medical records are not available, site PI is to obtain details from the participant regarding eligibility, and history is sent for adjudication</li> </ul>                                                   |
| <b>Idiopathic Generalized Epilepsy (IGE)</b>                                                                                                                                                                                                                                                                                                                                                                                                                                                                                                                                                                                                                                                                                                                                                                                                                                                                                                                                                                                                                                                                                                                                                                                                                                                                                                                                                                                                                                                                                                                       |
| <ul style="list-style-type: none"> <li>• Clinical seizures consistent with IGE</li> <li>• Subject has affected full sibling, a biological parent, or a biological child with non-symptomatic epilepsy willing to enroll in EPGP</li> <li>• Sibling is not an identical twin of participant (fraternal twin is allowed)</li> <li>• Brain MRI optional: results of MRI normal, if done</li> <li>• EEG or video EEG required: shows generalized epileptiform activity and a normal posterior dominant rhythm for age</li> <li>• If normal EEG, clear and compelling clinical history required: <b>send for adjudication</b></li> <li>• No history of premature birth before 32 weeks gestation</li> <li>• No evidence of moderate to severe developmental delay prior to the onset of seizures and medication (severe delay is characterized by 50% or more delay in any area: motor, social, language, cognition, or activities of living; or global delay). Cases with Attention Deficit Disorder, Attention Deficit Hyperactivity Disorder, Learning Disorders, etc. are not excluded.</li> <li>• No history of Autism or clear signs of autistic function (decreased eye contact, social interactiveness, moderate to severe language delay in a child who subsequently develops autism). Asperger's syndrome okay for inclusion</li> </ul>                                                                                                                                                                                                                       |
| <b>Localization-related Epilepsy (LRE)</b>                                                                                                                                                                                                                                                                                                                                                                                                                                                                                                                                                                                                                                                                                                                                                                                                                                                                                                                                                                                                                                                                                                                                                                                                                                                                                                                                                                                                                                                                                                                         |
| <ul style="list-style-type: none"> <li>• Clinical seizures consistent with LRE</li> <li>• Subject has affected full sibling, a biological parent, or a biological child with non-symptomatic epilepsy willing to enroll in EPGP</li> <li>• Sibling is not an identical twin of participant (fraternal twin is allowed)</li> <li>• Brain MRI required: results of MRI were normal, show focal cortical dysplasia, or show mesial temporal sclerosis</li> <li>• Brain MRI optional: results of EEG consistent with Benign Rolandic Epilepsy</li> <li>• If normal MRI, EEG or video EEG required: shows inter-ictal focal abnormality OR clinical or electrographic seizures on ictal EEG</li> <li>• If normal MRI, normal inter-ictal EEG, and no or normal ictal EEG, clear and compelling clinical history, required: <b>send for adjudication</b></li> <li>• No history of premature birth before 32 weeks gestation</li> <li>• No evidence of moderate to severe developmental delay prior to the onset of seizures and medication (severe delay is characterized by 50% or more delay in any area: motor, social, language, cognition, or activities of living; or global delay). Cases with Attention Deficit Disorder, Attention Deficit Hyperactivity Disorder, Learning Disorders, etc are NOT excluded.</li> <li>• There is no Autism or clear signs of autistic function (decreased eye contact, social interactiveness, moderate to severe language delay in a child who subsequently develops autism). Asperger's syndrome ok for inclusion.</li> </ul> |
| <b>Infantile Spasms (IS)/Lennox-Gastaut Syndrome (LGS) – Cryptogenic</b>                                                                                                                                                                                                                                                                                                                                                                                                                                                                                                                                                                                                                                                                                                                                                                                                                                                                                                                                                                                                                                                                                                                                                                                                                                                                                                                                                                                                                                                                                           |
| <ul style="list-style-type: none"> <li>• Clinical seizures and EEG consistent with IS or LGS</li> <li>• No history of congenital TORCH infection, premature birth before 32 weeks gestation, neonatal hypoxic</li> </ul>                                                                                                                                                                                                                                                                                                                                                                                                                                                                                                                                                                                                                                                                                                                                                                                                                                                                                                                                                                                                                                                                                                                                                                                                                                                                                                                                           |

|                                                                                                                                                                                                                                                                                                                                                                                                                                                                                                                                                                                                                                                                                                                                                                                                                                                                                                                                                                                                                                                                                                                                    |
|------------------------------------------------------------------------------------------------------------------------------------------------------------------------------------------------------------------------------------------------------------------------------------------------------------------------------------------------------------------------------------------------------------------------------------------------------------------------------------------------------------------------------------------------------------------------------------------------------------------------------------------------------------------------------------------------------------------------------------------------------------------------------------------------------------------------------------------------------------------------------------------------------------------------------------------------------------------------------------------------------------------------------------------------------------------------------------------------------------------------------------|
| <p>ischemic encephalopathy with or without neonatal seizures, meningitis/encephalitis, stroke, intra-cranial hemorrhage, or significant head trauma</p> <ul style="list-style-type: none"> <li>• No evidence of severe (50% or more delay in any area: motor, social, language, cognition, or activities of living; or global delay) developmental impairment prior to the onset of spasms</li> <li>• Both biological parents available and willing to enroll in EPGP</li> <li>• EEG required: results consistent with IS (hypsarrhythmia or hypsarrhythmia variant OR electrodecremental discharge) or LGS (slow or disorganized background, and slow spike and wave activity less than 2.7Hz or generalized paroxysmal fast activity-GPFA)</li> <li>• Brain MRI required: normal, mild atrophy, or steroid-induced atrophy</li> <li>• If present, Autism/signs of autism developed <i>after</i> the onset of seizures</li> </ul>                                                                                                                                                                                                 |
| <b>Infantile Spasms (IS) / Lennox-Gastaut Syndrome (LGS) – Focal Cortical Dysplasia (FCD)</b>                                                                                                                                                                                                                                                                                                                                                                                                                                                                                                                                                                                                                                                                                                                                                                                                                                                                                                                                                                                                                                      |
| <ul style="list-style-type: none"> <li>• Clinical seizures consistent with IS or LGS</li> <li>• Both biological parents available and willing to enroll in EPGP</li> <li>• EEG required: results are consistent with IS (hypsarrhythmia or hypsarrhythmia variant OR electrodecremental discharge) or LGS (slow or disorganized background, and slow spike and wave activity less than 2.7Hz or generalized paroxysmal fast activity-GPFA)</li> <li>• Brain MRI required: shows focal cortical dysplasia</li> <li>• If present, Autism/signs of autism developed <i>after</i> the onset of seizures</li> </ul>                                                                                                                                                                                                                                                                                                                                                                                                                                                                                                                     |
| <b>Polymicrogyria (PMG) / Bilateral Periventricular Nodular Heterotopia (PVNH)</b>                                                                                                                                                                                                                                                                                                                                                                                                                                                                                                                                                                                                                                                                                                                                                                                                                                                                                                                                                                                                                                                 |
| <ul style="list-style-type: none"> <li>• Clinical seizures consistent with GE, LRE, IS, LGS (mixed permitted)</li> <li>• Both biological parents available and willing to enroll in EPGP</li> <li>• No family history of X-linked PVNH, if known</li> <li>• Filamin A sequence analysis for PVNH is negative</li> <li>• Normal karyotype: no confirmed genetic syndrome or metabolic disease (Chromosome work up strongly suggested) <ul style="list-style-type: none"> <li>a) If chromosomal analysis has been done and results show normal chromosomes, person can be enrolled</li> <li>b) If chromosomal analysis has been done and results show an abnormality, enrollment depends on the abnormality: <b>send for adjudication</b></li> <li>c) If not yet done, chromosomal analysis is encouraged but not required prior to enrollment</li> </ul> </li> <li>• EEG not required for inclusion</li> <li>• Brain MRI required: shows PMG (of any type) or bilateral PVNH (but NOT neural tube defects or schizencephaly or band heterotopia)</li> <li>• Autism/signs of autism developed after the onset of seizures</li> </ul> |
| <b>Parent Controls</b>                                                                                                                                                                                                                                                                                                                                                                                                                                                                                                                                                                                                                                                                                                                                                                                                                                                                                                                                                                                                                                                                                                             |
| <ul style="list-style-type: none"> <li>• No history of epilepsy (toxic/metabolic seizures and/or febrile seizures okay to include)</li> </ul>                                                                                                                                                                                                                                                                                                                                                                                                                                                                                                                                                                                                                                                                                                                                                                                                                                                                                                                                                                                      |

**Figure 1: EPGP enrollment, phenotyping and data review process. EEG: electroencephalogram; MRI: magnetic resonance imaging; AED: antiepileptic drug**

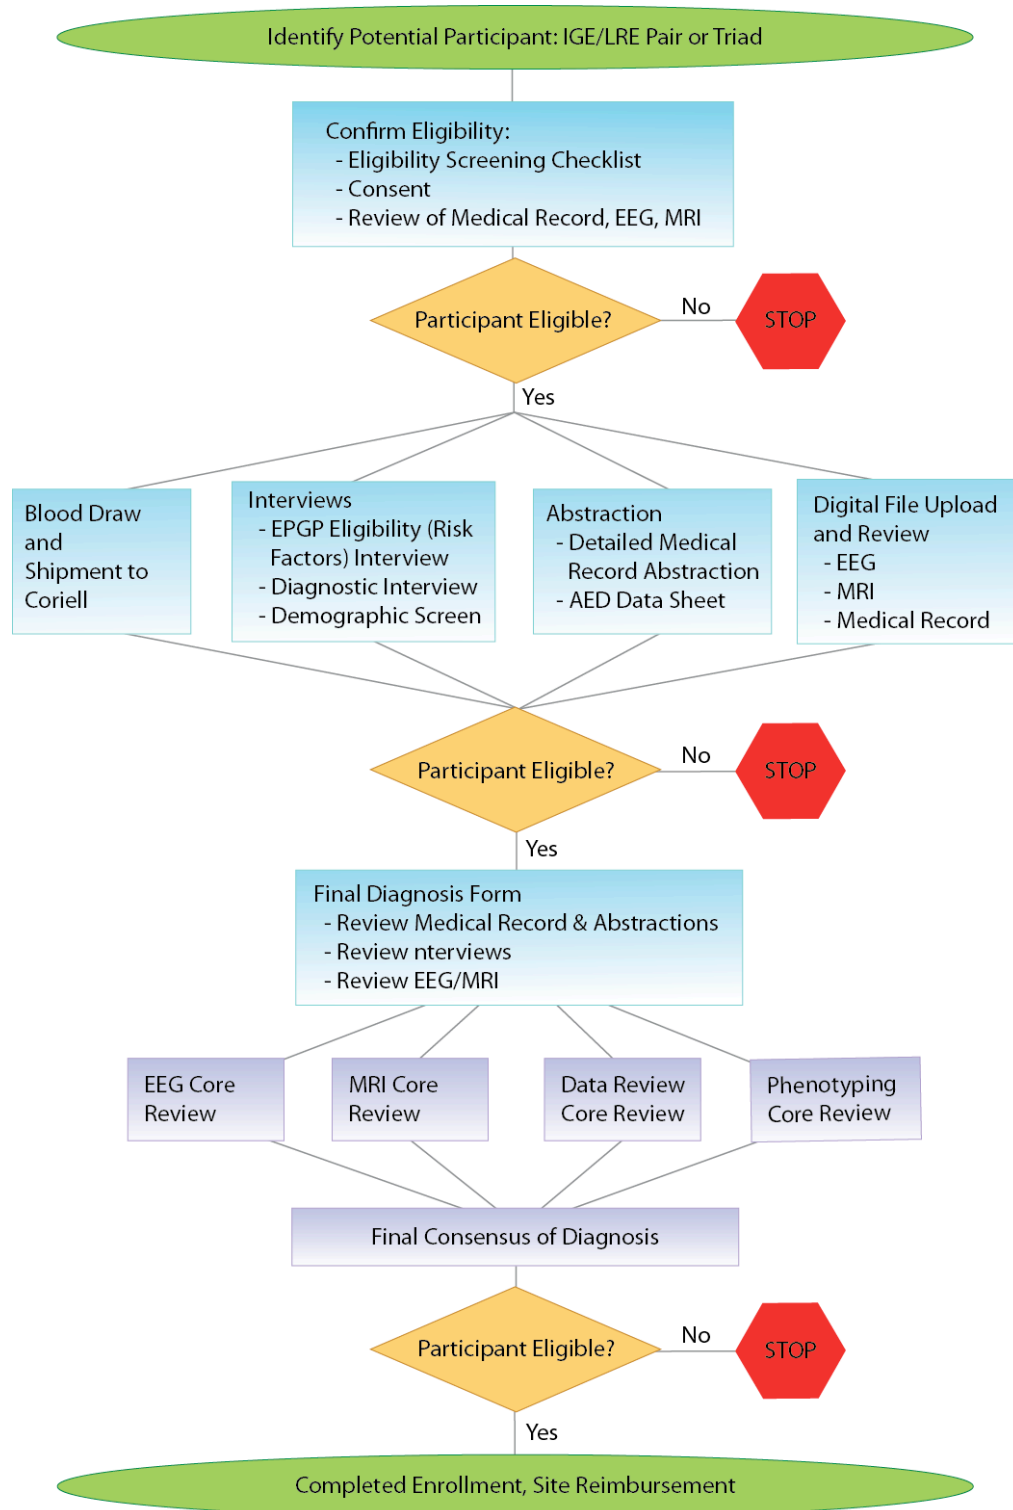

**Table 3. Activities Included in Data Collection Protocol, by Participant Type**

| Activity Name              | IGE Participant | LRE Participant | IS/LGS Proband | PMG/PVNH Proband | Parent Controls |
|----------------------------|-----------------|-----------------|----------------|------------------|-----------------|
| Eligibility Checklist      | Yes             | Yes             | Yes            | Yes              | Yes             |
| Consent                    | Yes             | Yes             | Yes            | Yes              | Yes             |
| Screening Interview        | Yes             | Yes             | Yes            | Yes              | Yes             |
| Specimen collection        | Yes             | Yes             | Yes            | Yes              | Yes             |
| Subject Demographics       | Yes             | Yes             | Yes            | Yes              | Yes             |
| Diagnostic Interview       | Yes             | Yes             |                |                  |                 |
| Medical Record Abstraction | Yes             | Yes             | Yes            | Yes              |                 |
| Pharmacogenomics Form      | Yes             | Yes             |                |                  |                 |
| AED Web Form               | Yes             | Yes             |                |                  |                 |
| EEG Review                 | Yes             | Yes             | Yes            |                  |                 |
| MRI Review                 | MRI optional    | Yes             | Yes            | Yes              |                 |
| Final diagnosis form       | Yes             | Yes             | Yes            | Yes              |                 |

Abbreviations: IGE – idiopathic generalized epilepsy; LRE – localization-related epilepsy; IS – infantile spasms; LGS – Lennox-Gastaut syndrome; PMG – polymicrogyria; PVNH – periventricular nodular heterotopia; AED – antiepileptic drug; EEG – electroencephalography; MRI – magnetic resonance imaging

**Figure 2: The EPGP organizational structure. OSMB: Observational Study Monitoring Board**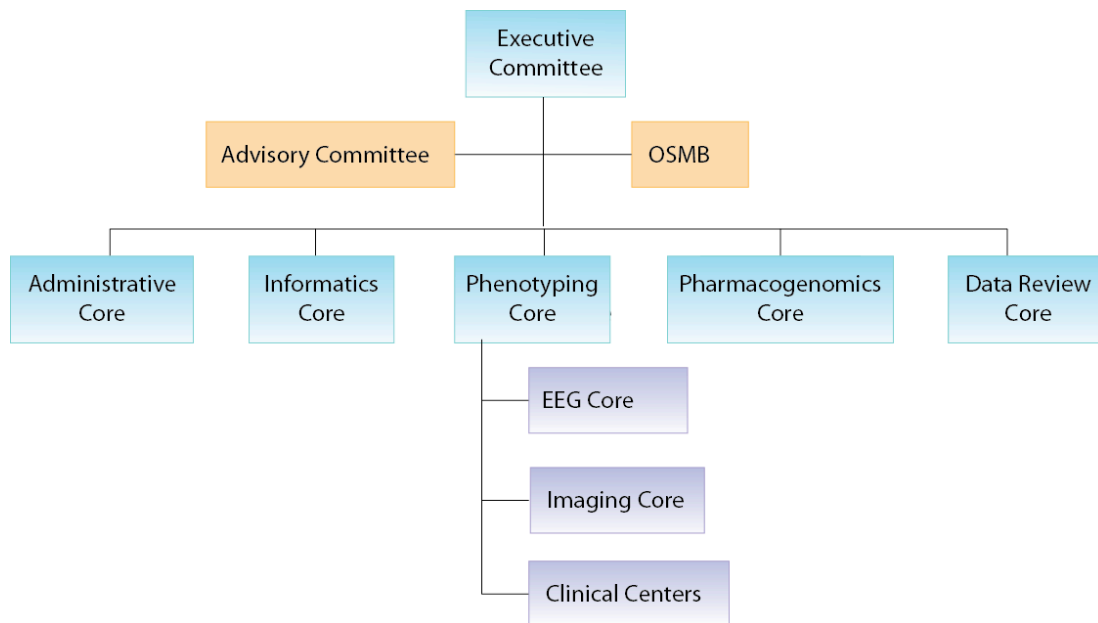



**Figure 3: Workflow for the review of participant data by the EPGP Data Review Core**

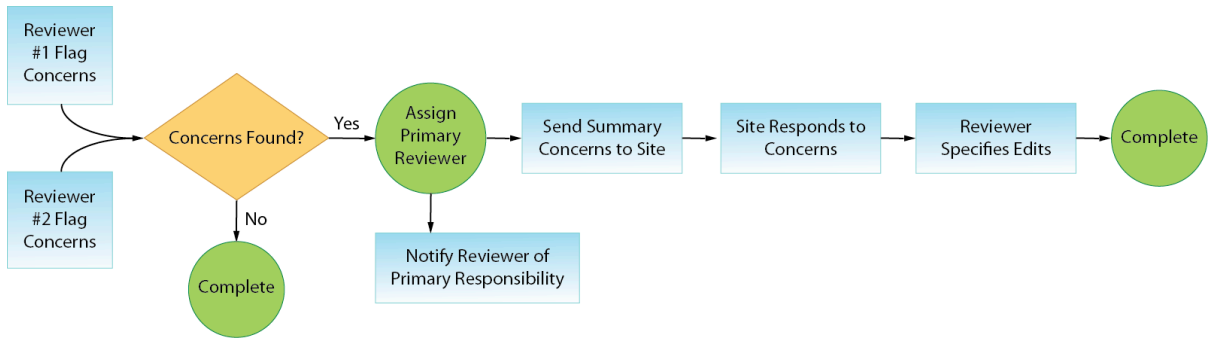

## SUPPLEMENTARY (ON-LINE) MATERIAL

Figure 1: Example of the planning timeline used by the EPGP Administrative Core

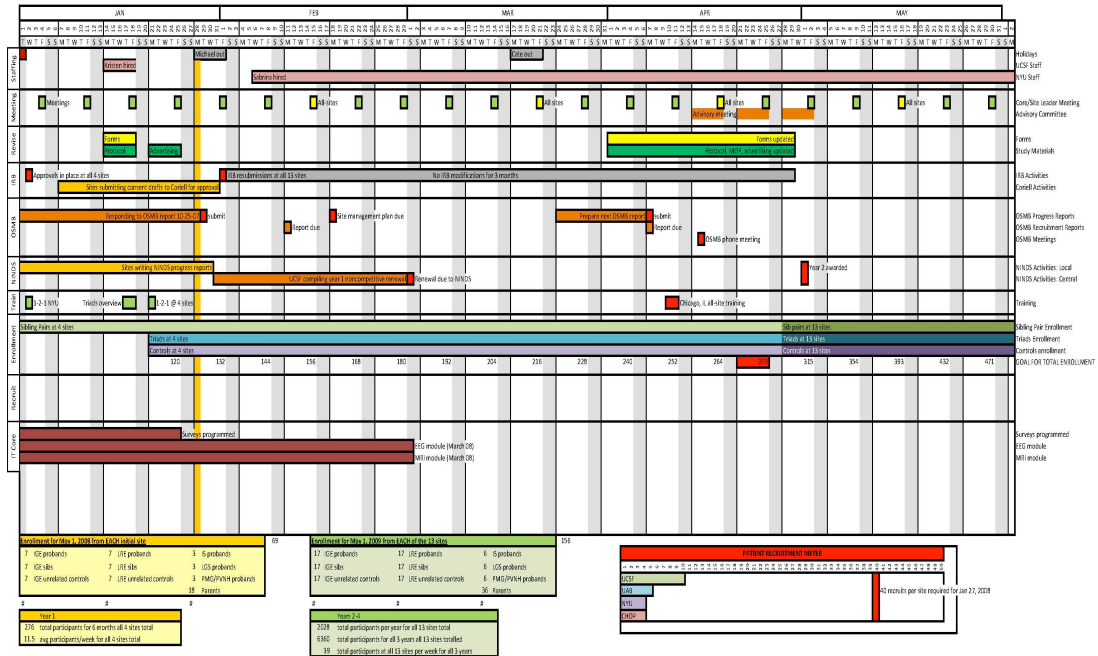

Figure 2: Example of the monthly EPGP newsletter (first two of three pages)

**EPGP Newsletter: December 2011**



**UPCOMING DATES**  
Numbers are the same for all calls.  
USA 877-594-8353  
code 36746656#  
Argentina 800-366-4969  
Australia 1800-045-963  
New Zealand 508-696-194

**All meetings are Fridays from 2-3 PM eastern / 11-12 pacific**

**December meetings:**  
12/16: Publications  
3<sup>rd</sup> Friday of month

**Scientific Cores, and Data Review Core will check in via email. Happy holidays!**

**January meetings:**  
1/13: All-site  
2<sup>nd</sup> Friday of month

1/20: Publications  
3<sup>rd</sup> Friday of month

1/27: Scientific Cores, and Data Review Core

**Overview**

1. Ship blood by Thursday 12/22 and Thursday 12/29
2. Meeting at AES
  1. Thank you!
  2. Unit completion doubled in the last 9 months!
  3. Phenotyping progress and work to be done
  4. Single-blood family option to help unit close-out
  5. Adjustations to keep participants in and skip activities
  6. Renew our recruitment efforts: we are trying to reach 4,000 by 4/30!
  7. Publications and data review
  8. Epi4K update
3. "Site future" poll
4. Recruitment and Phenotyping Tables

**Blood Shipments over the Holidays**  
Christmas: blood shipments must be at FedEx by the afternoon of Thursday 12/22 with next business morning shipping and received at Coriell on Friday 12/23 in order to ensure that they'll be processed—Coriell is closed on Monday 12/26.  
New Year: blood shipments must be at FedEx by the afternoon of Thursday 12/29 with next business morning shipping and received at Coriell on Friday 12/30 in order to ensure that they'll be processed—Coriell is closed on Monday 1/2.

**Meeting at AES**  
Representatives of most sites gathered on Sunday December 4, 2011 to review EPGP's current progress and challenges, and to come up with plans for the year-5-6 transition. A summary of the meetings is included in the newsletter, below, and the slides shown are attached.

We are filled with gratitude to the group for the dedication that is bringing EPGP to fruition. Although it's been said a hundred times, we are so grateful for the work that everyone does every day. Thank you!




As you may remember, our group has worked through and solved many challenges. We have fine tuned instruments and workflow, increased the size of the network, improved informatics systems, implemented central screening of referrals, established a data review core, and a number of other changes; through it all, what is most remarkable is this network's dedication and support of one another.

**Thank you for being part of this historic effort.**

Remarkably, we have gone from 40% unit completion in March 2011 to 80% unit completion today. This is an amazing accomplishment by our clinical center teams. Way to go!

|                | Units Complete in March 2011 | Units Completed Nov 2011 |
|----------------|------------------------------|--------------------------|
| IGE-LRE Arm    | 272                          | 657                      |
| Triads         | 258                          | 451                      |
| All Study Arms | 530                          | 1108                     |

**Phenotyping**  
As you can see in the numbers below (and attached), we have completed a huge amount of work (more than 25,000 activities).

More thanks go to the clinical centers, particularly the study coordinators, for pushing through so quickly with the very new request to upload key medical records for all EPGP participants. We have already uploaded 25% of the medical records for our cohort. Having these records as a permanent record, available with our other phenotype data, is an invaluable resource. We can feel very good about the dataset that we have now.

Site Clinicians/Pis, please continue to work to get your EEG reviews and final diagnosis forms completed. We have many family units "incomplete" simply because of one or two PI activities!

Cate is working with Coriell and the Epi4K folks to resolve some questions about the DNA that is available at the Repository. Please continue to hold off on re-drawing blood for now, so we can be sure that we are only asking for blood in cases where there is no other option.

|               | Blood | Demo | Elig | dx   | MR   | MR Abs | EEG  | EEG IPI | MRI  | PI   |
|---------------|-------|------|------|------|------|--------|------|---------|------|------|
| Outstanding   | 751   | 503  | 500  | 401  | 2372 | 712    | 792  | 887     | 408  | 987  |
| Completed     | 3797  | 4045 | 4048 | 2255 | 786  | 2446   | 2225 | 2130    | 1493 | 2171 |
| % Outstanding | 17%   | 11%  | 11%  | 15%  | 75%  | 23%    | 26%  | 29%     | 21%  | 31%  |

**Single-Blood Families Skip Blood and Interviews**  
Finally, don't forget to use the single-blood family! Remember, basically, the single-blood family has a "normal" IGE/LRE proband, and a consented affected family member that has only consent and medical records available to confirm IGE/LRE (including an EEG/MRI that meets criteria) and whenever possible, interviews, but no blood sample (which could be for a variety of reasons). If you have IGE/LRE families that are hard to reach and you have their records, whether or not you have the second blood, reclassify them as single-blood families and close them out! You still get "credit" for that second blood if blood is available, and the blood will still be used in our analysis, but you will be able to skip interviews.

**PI Interview to Clarify**  
If your site PI does a "PI interview" to clarify a participant's history, please type up these notes and upload them as a source document. The IT system will be updated soon to enable this new feature.

**Recruitment**  
We need to renew our recruitment efforts. This is the time to push for recruitment, given that most sites have cleared up the phenotyping backlog. We have consented 93% of our target for this timepoint, but only have 75% (3,591 participants) of the target actively enrolled as eligible due to dropping those who don't ultimately meet our criteria or do not complete their participation. To reach 4,000 by April 30, 2012, each site needs a net enrollment of at least 3.5 participants per month. Please do everything you can to bring in your consent forms during this "home stretch."

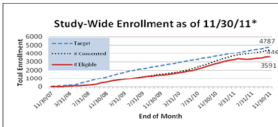

**Publications**  
We have 5 papers that will hopefully be published in the coming year, including: familial concordance, circadian rhythms, PMG clinical data, IS clinical data, LGS clinical data, and race/ethnicity and epilepsy type. Two overview papers have already been submitted: an overview of the EPGP study, and a description of the EPGP informatics systems.

**Data Review Efforts**  
The Data Review Core has continued to work to assure that the dataset is as accurate as possible, and to date has reviewed 230 participants. In the coming weeks, we will look at the dataset to see:
